# Supplementary material
Source: PubMed Central journal article supplement (PMC2780802)
Supplement: 0908249106_0908249106SI.pdf [file 0908249106_0908249106SI.pdf]

# Supporting Information

Monticelli et al. 10.1073/pnas.0908249106

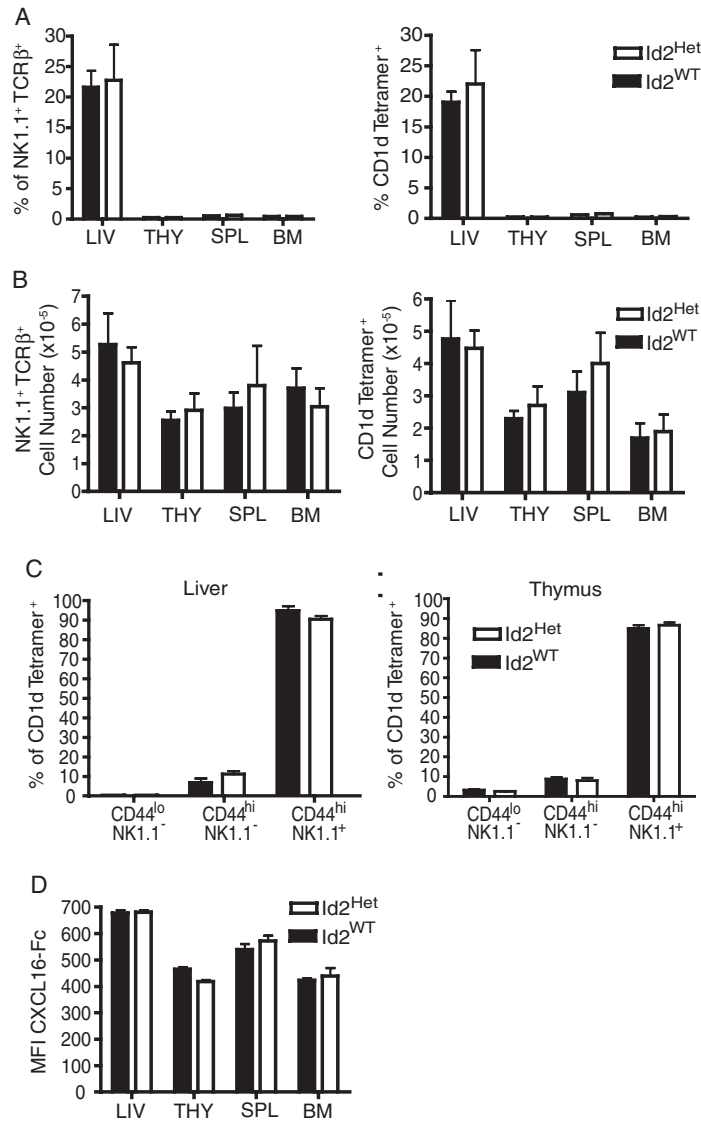

**Fig. S1.** Id2<sup>+/+</sup> and Id2<sup>+/-</sup> mice generate equivalent NKT cell populations. (A) Percentage of NK1.1<sup>+</sup>TCRβ<sup>+</sup> and CD1d tetramer<sup>+</sup> NKT cells in the liver, thymus, spleen, and bone marrow of 6-week-old Id2<sup>+/+</sup> and Id2<sup>+/-</sup> mice. (B) Absolute cell numbers of NK1.1<sup>+</sup> TCRβ<sup>+</sup> or CD1d tetramer<sup>+</sup> NKT cells for indicated tissues. (C) Percentage of αGalCer-loaded CD1d tetramer<sup>+</sup> NKT cells for indicated developmental subsets. Hepatic and thymic NKT cells were gated on expression of TCRβ and αGalCer-loaded CD1d tetramer, then examined for expression of NK1.1 and CD44. (D) Mean fluorescence of CXCL16-Fc binding to NK1.1<sup>+</sup> TCRβ<sup>+</sup> NKT cells in the liver, thymus, spleen, and bone marrow. All data shown are the average (± SEM), n = 3 Id2<sup>WT</sup> and 3 Id2<sup>+/-</sup>, \*P < 0.05, \*\*P < 0.005, \*\*\*P < 0.0005. Statistical significance determined using unpaired two-tailed t-test.



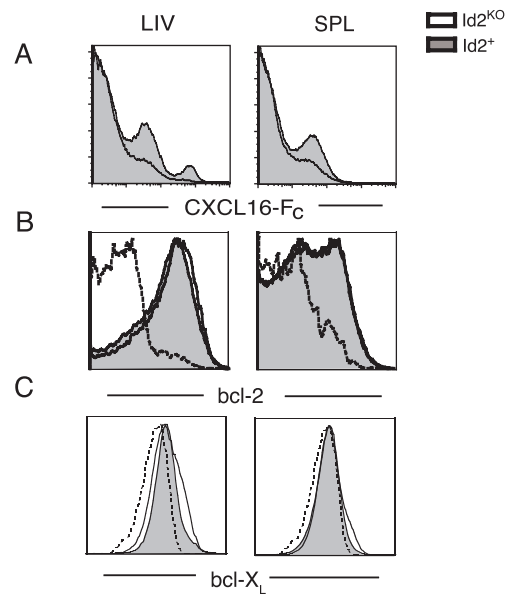

**Fig. S3.** Expression of CXCR6, bcl-2 and bcl-X<sub>L</sub> by conventional Id<sup>KO</sup> and Id<sup>WT</sup> T cells. Expression of (A) CXCR6, (B) bcl-2, and (C) bcl-X<sub>L</sub> determined by flow cytometry. Conventional T cells from samples shown in Fig. 5 were identified by expression of congenic marker and were NK1.1<sup>-</sup>TCRβ<sup>+</sup>. Isotype controls dashed lines; Id<sup>KO</sup> unfilled; Id<sup>+</sup> shaded. Flow cytometry data are representative of at least four pairs of Id<sup>KO</sup> and Id<sup>+</sup> chimeras.



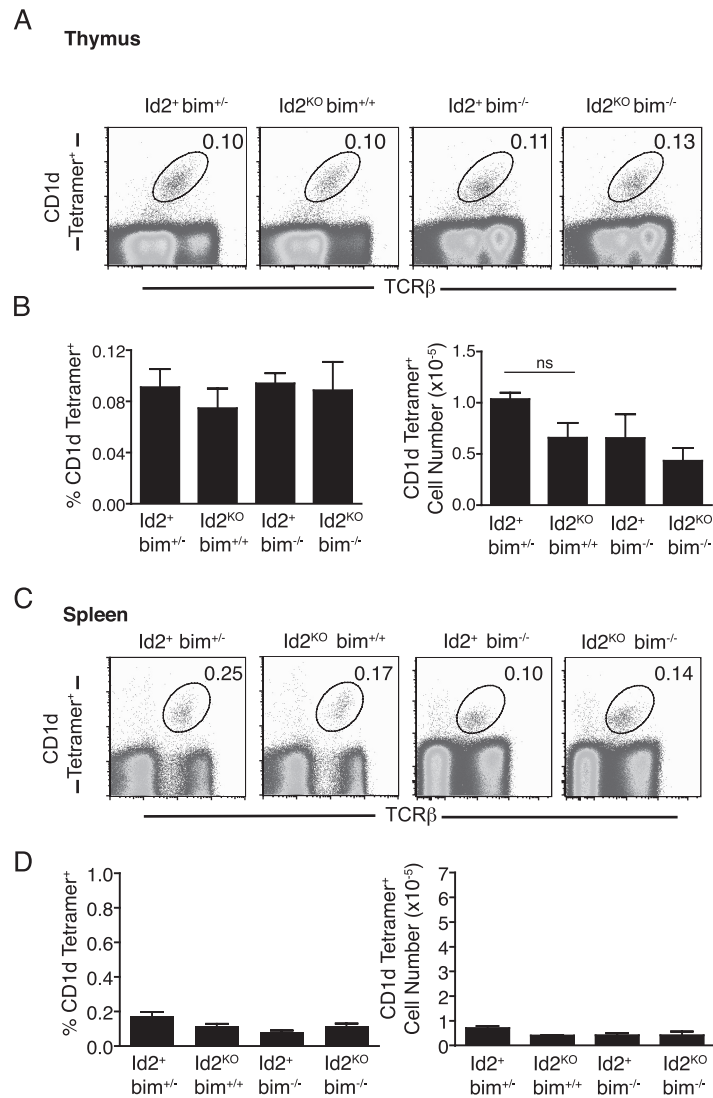

**Fig. S5.** Analysis of NKT cell populations in thymus and spleen of chimeras reconstituted with Id2<sup>WT</sup> or Id2<sup>KO</sup> bim-deficient donor cells. Analysis of lymphocytes recovered from Id2<sup>+</sup>bim<sup>+/+</sup>, Id2<sup>KO</sup>bim<sup>+/+</sup>, Id2<sup>+</sup>bim<sup>-/-</sup>, or Id2<sup>KO</sup> bim<sup>-/-</sup> fetal liver chimeras. (A) Representative flow cytometry plots identifying NKT cells by TCR $\beta$  and CD1d tetramer staining of thymus. (B) Average percentage ( $\pm$  SEM) of indicated populations from (A). (C) Representative flow cytometry plots identifying NKT cells by TCR $\beta$  and CD1d tetramer staining of spleen. (D) Average percentage ( $\pm$  SEM) of indicated populations from (C). Data are representative of three independent experiments with  $n = 3-5$  per group. Statistical significance determined using unpaired two-tailed  $t$ -test where  $ns > 0.05$ .
